# Supplementary material
Source: PubMed Central journal article supplement (PMC5346307)

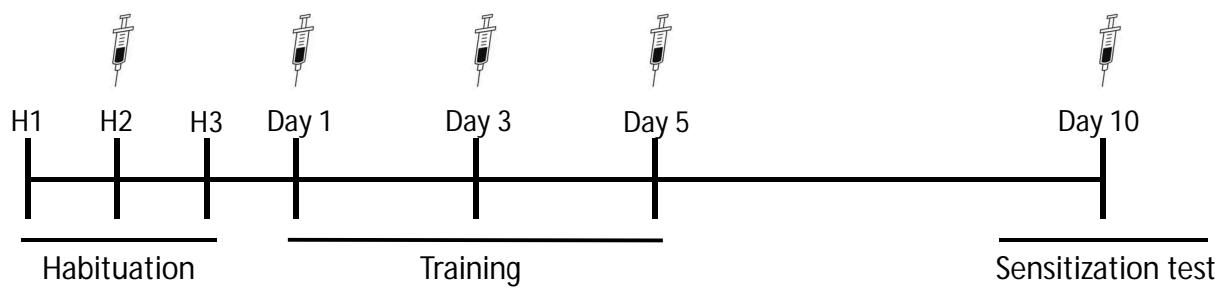

Supplement: NIHMS6591-supplement-Suppl__1.pdf [file NIHMS6591-supplement-Suppl__1.pdf]

# SENSITIZATION TEST

## AMBULATORY ACTIVITY

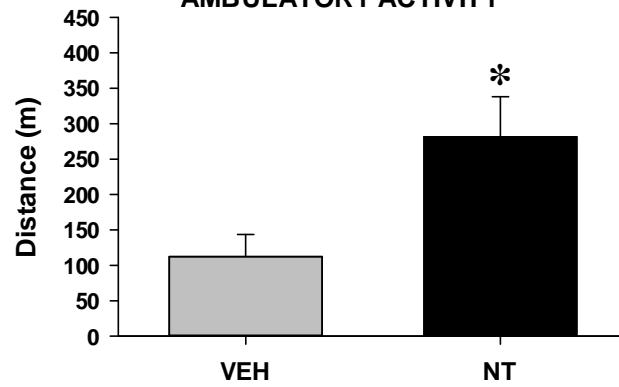

## NON-AMBULATORY ACTIVITY

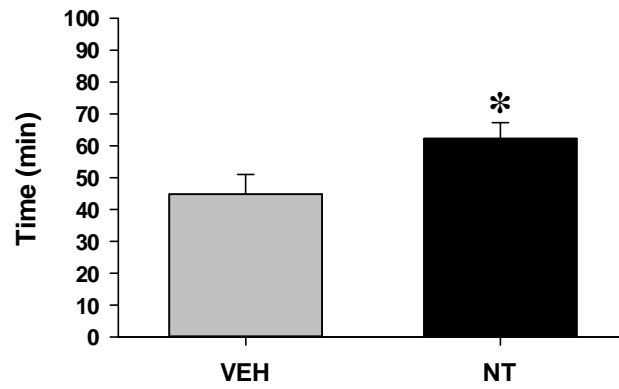

## VERTICAL ACTIVITY

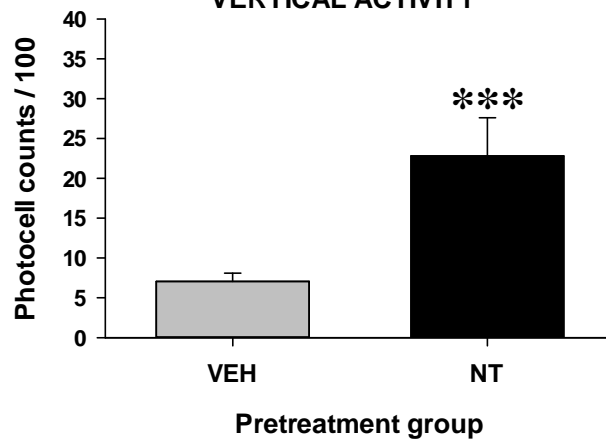

Supplement: NIHMS6591-supplement-Suppl__2.pdf [file NIHMS6591-supplement-Suppl__2.pdf]
